# Supplementary material for: Serum Metabolomics to Identify the Liver Disease-Specific Biomarkers for the Progression of Hepatitis to Hepatocellular Carcinoma
Source: PubMed Central journal article supplement (PMC4674760; doi:10.1038/srep18175), 2015-12-10
Supplement: srep18175-s1.pdf [file srep18175-s1.pdf]

## **Supplementary Information**

*for*

### **Serum Metabolomics to Identify the Liver Disease-Specific Biomarkers for the Progression of Hepatitis to Hepatocellular Carcinoma**

Rong Gao,<sup>1</sup> Jianhua Cheng,<sup>1</sup> Chunlei Fan<sup>2</sup>, Xiaofeng Shi<sup>3</sup>, Yuan Cao<sup>4</sup>, Bo Sun,<sup>1</sup>

Huiguo Ding<sup>2</sup>, Chengjin Hu<sup>4</sup>, Fangting Dong,<sup>1\*</sup> Xianzhong Yan<sup>1\*</sup>

1. National Center of Biomedical Analysis, Beijing 100850, China;
2. Department of Gastroenterology and Hepatology, Beijing You'an Hospital affiliated to Capital Medical University, Beijing 100069, China;
3. Key Laboratory of Molecular Biology for Infectious Diseases, Ministry of Education, China; Department of Infectious Diseases, the Second Affiliated Hospital of Chongqing Medical University, Chongqing 400010, China;
4. Department of Laboratory Medicine, the General Hospital of Jinan Military Command, Jinan 250031, Shandong, China.

Supplementary Table S1. The Pearson correlation coefficient of the randomly selected duplicate samples.

| <b>Duplicate sample (DS)</b> | <b>Pearson Correlation Coefficient</b> | <b>Duplicate Sample (DS)</b> | <b>Pearson Correlation Coefficient</b> |
|------------------------------|----------------------------------------|------------------------------|----------------------------------------|
| DS-1                         | 0.998268058                            | DS-16                        | 0.999686837                            |
| DS-2                         | 0.999072175                            | DS-17                        | 0.985738252                            |
| DS-3                         | 0.999426573                            | DS-18                        | 0.999634599                            |
| DS-4                         | 0.999664146                            | DS-19                        | 0.999440753                            |
| DS-5                         | 0.999856752                            | DS-20                        | 0.999939986                            |
| DS-6                         | 0.999243799                            | DS-21                        | 0.999047992                            |
| DS-7                         | 0.999481800                            | DS-22                        | 0.999790789                            |
| DS-8                         | 0.999781987                            | DS-23                        | 0.999958316                            |
| DS-9                         | 0.998400789                            | DS-24                        | 0.999389796                            |
| DS-10                        | 0.997037309                            | DS-25                        | 0.999946129                            |
| DS-11                        | 0.999941303                            | DS-26                        | 0.999935874                            |
| DS-12                        | 0.999931416                            | DS-27                        | 0.969182726                            |
| DS-13                        | 0.999990246                            | DS-28                        | 0.987997904                            |
| DS-14                        | 0.999800965                            | DS-29                        | 0.994257984                            |
| DS-15                        | 0.999827710                            | DS-30                        | 0.978366691                            |

Supplementary Table S2. The stepwise discriminant functions variables and classification function coefficients of the four groups.

| <b>Metabolites</b>                       | <b>C*(CON)</b> | <b>C*(HBV)</b> | <b>C*(LC)</b> | <b>C*(HCC)</b> |
|------------------------------------------|----------------|----------------|---------------|----------------|
| <b>Boric acid</b>                        | -3.84E-06      | 8.52E-06       | -3.35E-06     | -3.84E-06      |
| <b>Trans-1,2-cyclopropanecarboxylate</b> | 2.60E-06       | 8.98E-05       | 4.95E-05      | 2.60E-06       |
| <b>Valine</b>                            | 3.11E-06       | -6.35E-06      | -8.24E-07     | 3.11E-06       |
| <b>Oxalic acid</b>                       | 7.16E-06       | 4.00E-05       | 1.11E-06      | 7.16E-06       |
| <b>Isoleucine</b>                        | -5.80E-06      | -2.43E-06      | 2.49E-06      | -5.80E-06      |
| <b>3-methyl-2-hydroxybutyric acid</b>    | -1.85E-06      | -8.60E-06      | -4.01E-06     | -1.85E-06      |
| <b>Ethanolamine</b>                      | 1.03E-04       | -3.62E-04      | 3.49E-05      | 1.03E-04       |
| <b>Leucine</b>                           | 1.64E-05       | -2.37E-05      | 1.48E-05      | 1.64E-05       |
| <b>Succinic acid</b>                     | -5.03E-06      | -1.32E-05      | 5.76E-07      | -5.03E-06      |
| <b>Salicylaldehyde</b>                   | 7.74E-04       | 6.22E-03       | 1.09E-03      | 7.74E-04       |
| <b>4-Hydroxy-Proline</b>                 | -1.93E-06      | -4.27E-05      | -4.32E-06     | -1.93E-06      |
| <b>Threitol</b>                          | 3.52E-05       | 6.37E-05       | 3.21E-05      | 3.52E-05       |
| <b>Methionine</b>                        | 3.72E-06       | -1.57E-05      | -6.48E-06     | 3.72E-06       |
| <b>Glutamate</b>                         | 2.33E-06       | 1.46E-05       | 3.47E-06      | 2.33E-06       |
| <b>Threonic acid</b>                     | -3.40E-06      | -6.19E-06      | -2.07E-07     | -3.40E-06      |
| <b>Glutamate</b>                         | 5.71E-06       | -6.16E-06      | 2.08E-07      | 5.71E-06       |
| <b>Dodecanoic acid</b>                   | 2.78E-05       | -2.07E-04      | -5.97E-05     | 2.78E-05       |
| <b>Asparagine</b>                        | -1.17E-04      | 1.42E-04       | 1.44E-04      | -1.17E-04      |
| <b>9H-purine</b>                         | -1.65E-05      | -2.40E-04      | -2.88E-05     | -1.65E-05      |
| <b>Citrulline</b>                        | 1.61E-04       | 1.31E-05       | -1.99E-06     | 1.61E-04       |
| <b>Methionine sulfoxide</b>              | -2.03E-05      | 2.98E-04       | 5.30E-05      | -2.03E-05      |
| <b>Fructose</b>                          | -8.55E-06      | -4.19E-05      | -1.71E-05     | -8.55E-06      |
| <b>Glucose</b>                           | 5.56E-06       | -2.60E-05      | -1.87E-05     | 5.56E-06       |
| <b>Altrose</b>                           | -1.56E-05      | 7.33E-05       | -2.17E-05     | -1.56E-05      |
| <b>Arachidic acid</b>                    | 2.66E-04       | -3.50E-04      | 4.04E-05      | 2.66E-04       |
| <b>Methyl -β-D-galactopyranoside</b>     | -1.59E-07      | 8.61E-07       | 3.19E-06      | -1.59E-07      |
| <b>Palmitic acid</b>                     | 2.60E-08       | 1.02E-05       | 3.64E-06      | 2.60E-08       |

---

|                      |           |           |           |           |
|----------------------|-----------|-----------|-----------|-----------|
| <b>Noradrenaline</b> | -7.71E-05 | 3.31E-04  | -1.10E-04 | -7.71E-05 |
| <b>Stearic acid</b>  | -1.05E-06 | -9.35E-06 | -1.04E-06 | -1.05E-06 |
| <b>Sucrose</b>       | -2.70E-07 | 1.68E-05  | -1.91E-06 | -2.70E-07 |
| <b>Constant</b>      | -1.55E+03 | -1.91E+03 | -4.68E+02 | -2.42E+02 |

---

Supplementary Table S3. The Bayes Classification Results of training and validation data sets.

|                            |       | group | Predicted Group Membership |        |        |        | Total  |
|----------------------------|-------|-------|----------------------------|--------|--------|--------|--------|
|                            |       |       | NC                         | HBV    | LC     | HCC    |        |
| <b>Training data set</b>   | Count | NC    | 40                         | 0      | 0      | 0      | 40     |
|                            |       | HBV   | 0                          | 32     | 0      | 0      | 32     |
|                            |       | LC    | 0                          | 0      | 34     | 0      | 34     |
|                            |       | HCC   | 0                          | 0      | 0      | 26     | 26     |
|                            | %     | NC    | 100.00                     | 0.00   | 0.00   | 0.00   | 100.00 |
|                            |       | HBV   | 0.00                       | 100.00 | 0.00   | 0.00   | 100.00 |
|                            |       | LC    | 0.00                       | 0.00   | 100.00 | 0.00   | 100.00 |
|                            |       | HCC   | 0.00                       | 0.00   | 0.00   | 100.00 | 100.00 |
| <b>Validation data set</b> | Count | NC    | 21                         | 0      | 0      | 0      | 21     |
|                            |       | HBV   | 1                          | 16     | 0      | 0      | 17     |
|                            |       | LC    | 0                          | 0      | 18     | 0      | 18     |
|                            |       | HCC   | 0                          | 0      | 3      | 10     | 13     |
|                            | %     | NC    | 100.00                     | 0.00   | 0.00   | 0.00   | 100.00 |
|                            |       | HBV   | 5.88                       | 94.12  | 0.00   | 0.00   | 100.00 |
|                            |       | LC    | 0.00                       | 0.00   | 100.00 | 0.00   | 100.00 |
|                            |       | HCC   | 0.00                       | 0.00   | 23.08  | 76.92  | 100.00 |

Supplementary Table S4. Characteristics of the healthy controls and patients with chronic hepatic diseases and HCC

| Characteristics      | NC (n=61)             | HBV (n=49)                   | LC (n=52)                      | HCC (n=39)                   |
|----------------------|-----------------------|------------------------------|--------------------------------|------------------------------|
| Age (years)          | 40.0 ± 9.8<br>(18~71) | 43.9 ± 9.5<br>(20~76)        | 48.2 ± 10.0<br>(25~72)         | 54.7 ± 8.8<br>(24~84)        |
| Male (%)             | 69.2                  | 84.3                         | 78.5                           | 86.2                         |
| AFP<br>(range),ng/ml | /                     | 51.85 ± 70.2<br>(1.88~210.2) | 211.8 ± 387.3<br>(2.08~1189.3) | 233.9 ± 430.3<br>(1.86~1210) |
| HbsAg                | Negative              | Positive                     | Positive                       | Positive                     |

NC: Healthy control; HBV: Hepatitis B virus; LC: Liver cirrhosis; HCC: Hepatocellular carcinoma; AFP: alpha fetal protein.

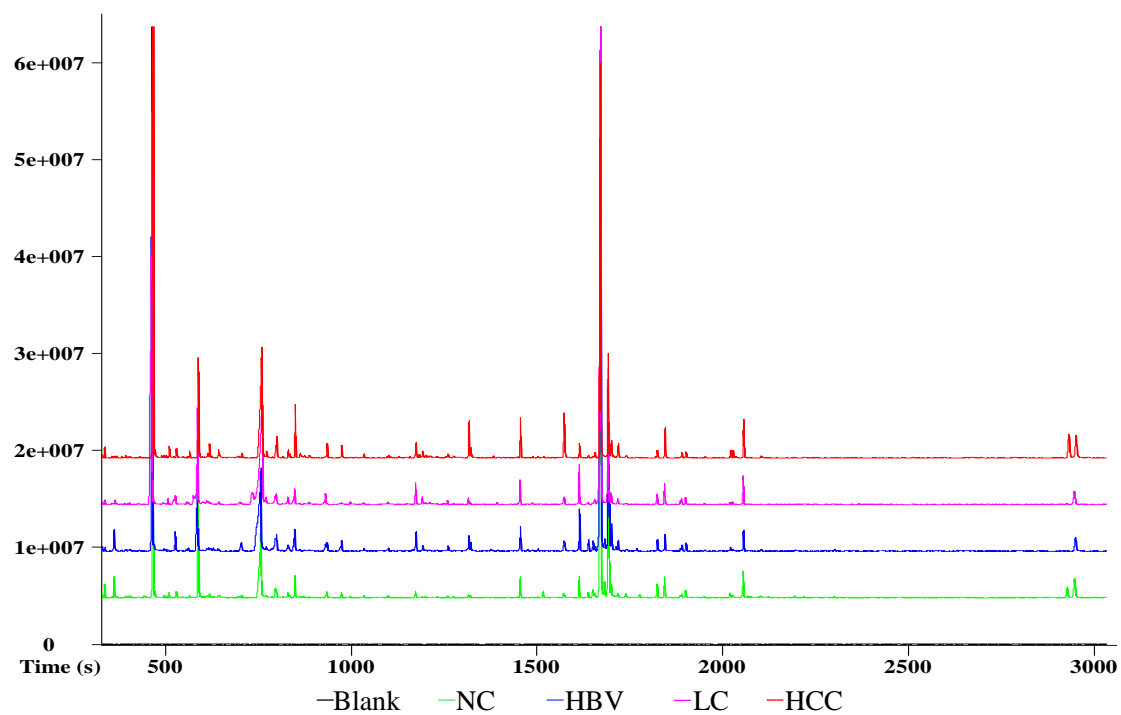

**Figure S1. Metabolic profilings of representative serum samples.** The GC-TOFMS TIC chromatograms for blank (black line), health control (CN, green line), HBV (blue line), LC (purple line) and HCC (red line). X axis and Y axis represent the retention time (s) and relative peak intensity, respectively.





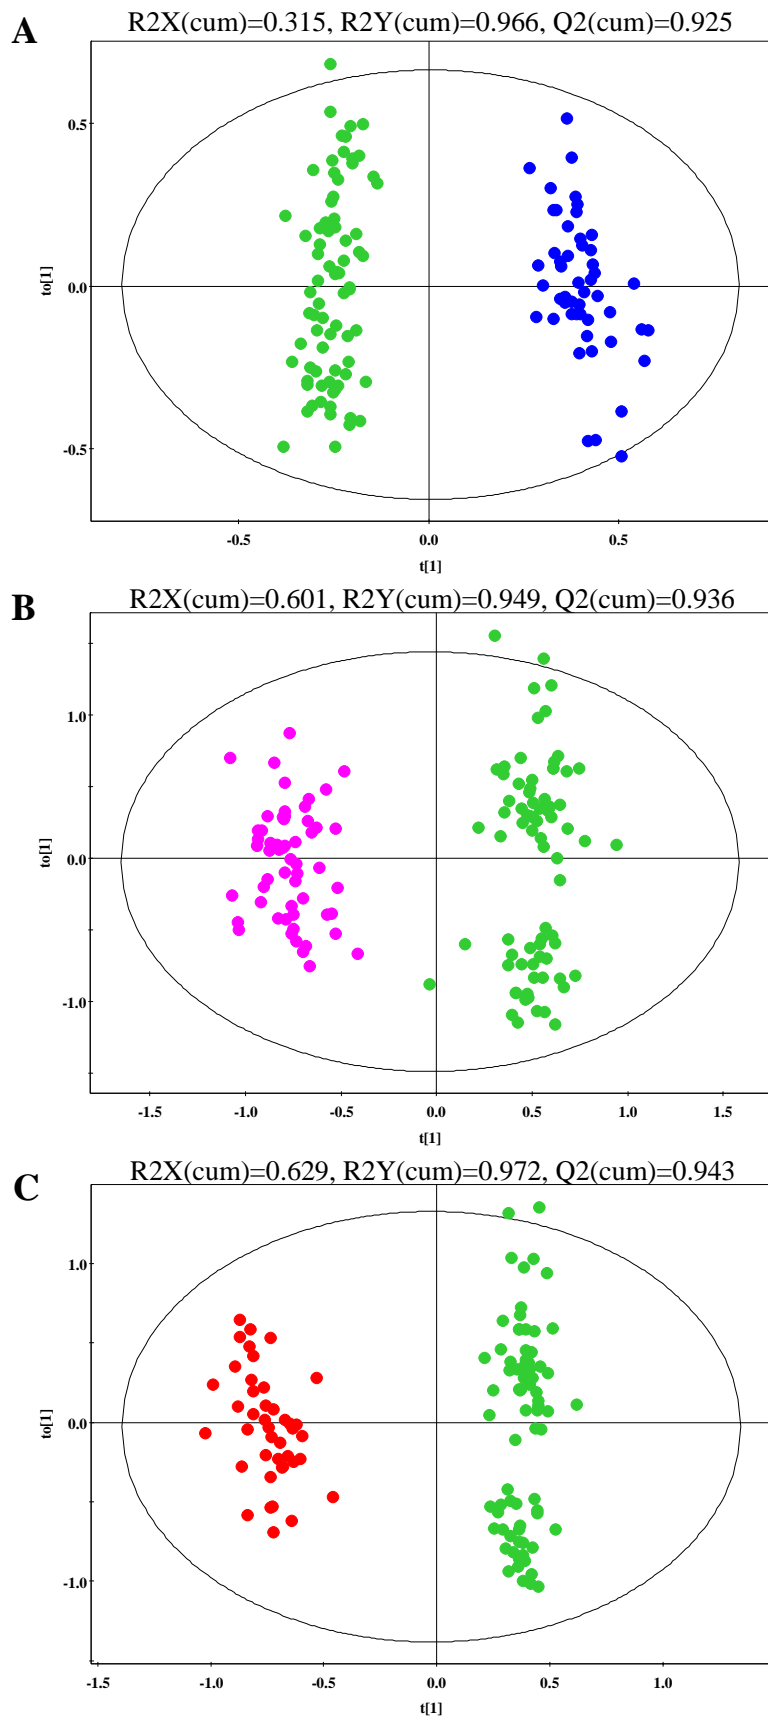

**Figure S3.** OPLS-DA scores plots for serum samples of (A) patients with HBV (●) and NC (●), (B) patients with LC (●) and NC (●), and (C) patients with HCC (●) and NC (●).

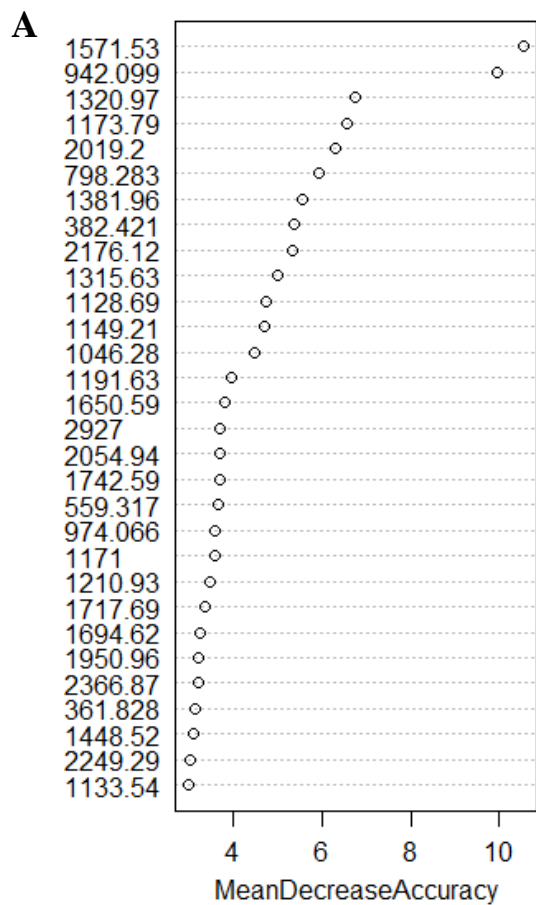

|          | Predicted HBV | Predicted NC |
|----------|---------------|--------------|
| True HBV | 32            | 0            |
| True NC  | 0             | 40           |

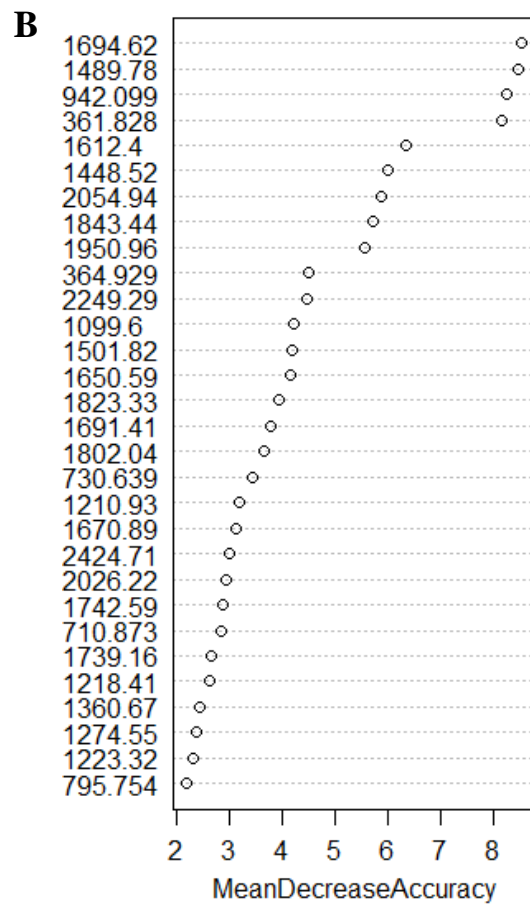

|          | Predicted LC | Predicted HBV |
|----------|--------------|---------------|
| True LC  | 34           | 0             |
| True HBV | 0            | 32            |

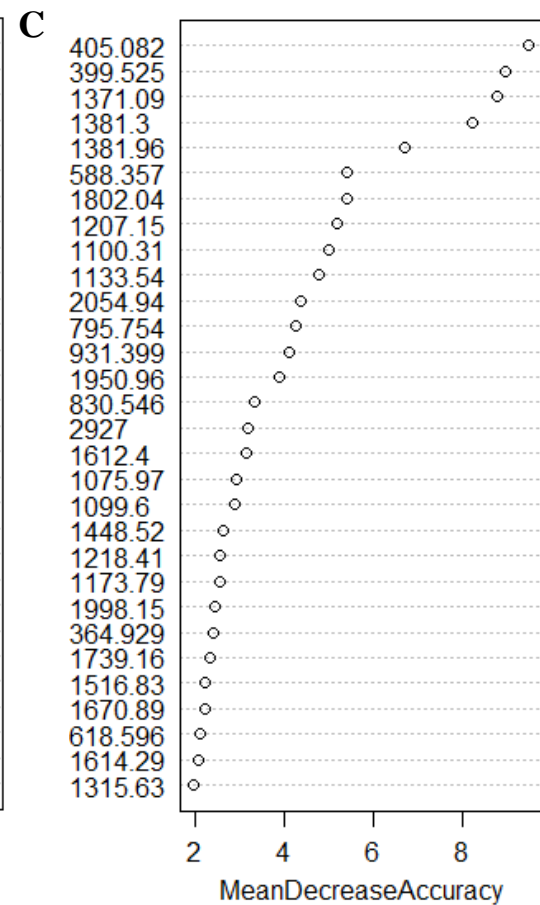

|          | Predicted HCC | Predicted LC |
|----------|---------------|--------------|
| True HCC | 26            | 0            |
| True LC  | 0             | 34           |

**Figure S4.** The top 30 ranked differential metabolites according to the mean decrease accuracy (MDA) and performance of Random Forest (RFs) models discriminating (A) HBV from NC, (B) LC from HBV and (C) HCC from LC based on training data set serum.

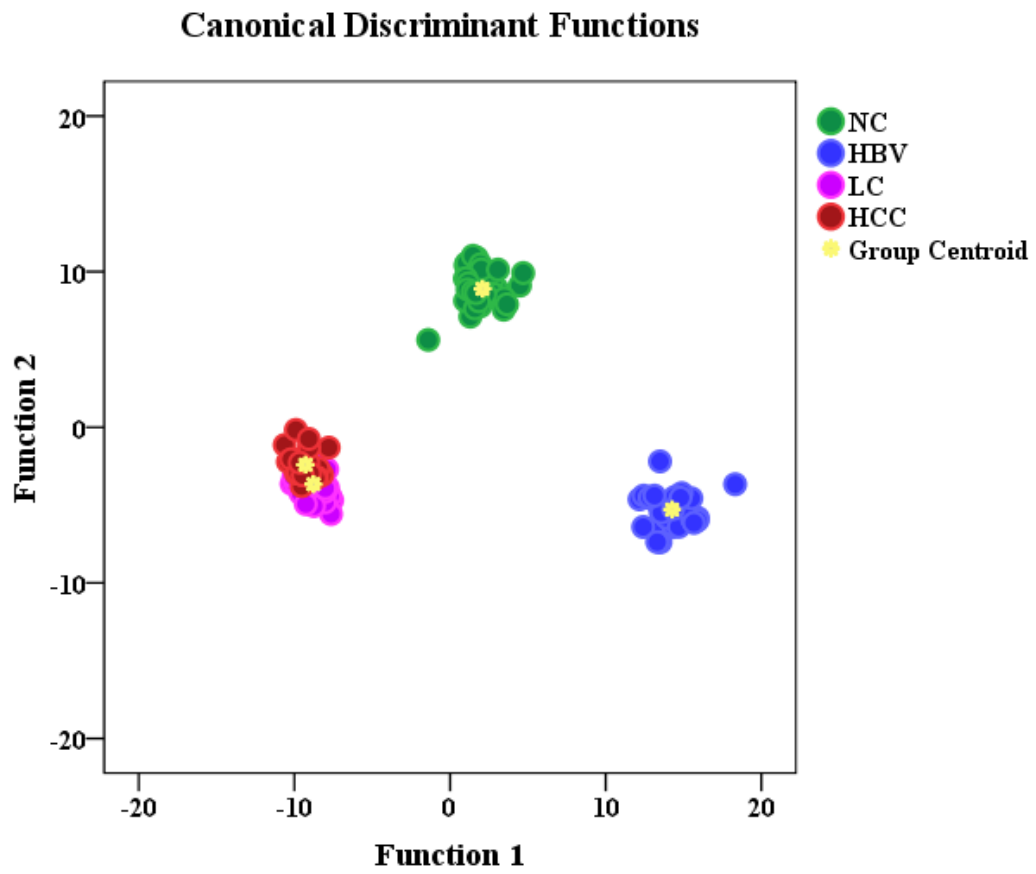

**Figure S5.** The discriminant function model based on Bayes' Rule by stepwise discriminant analysis.

A

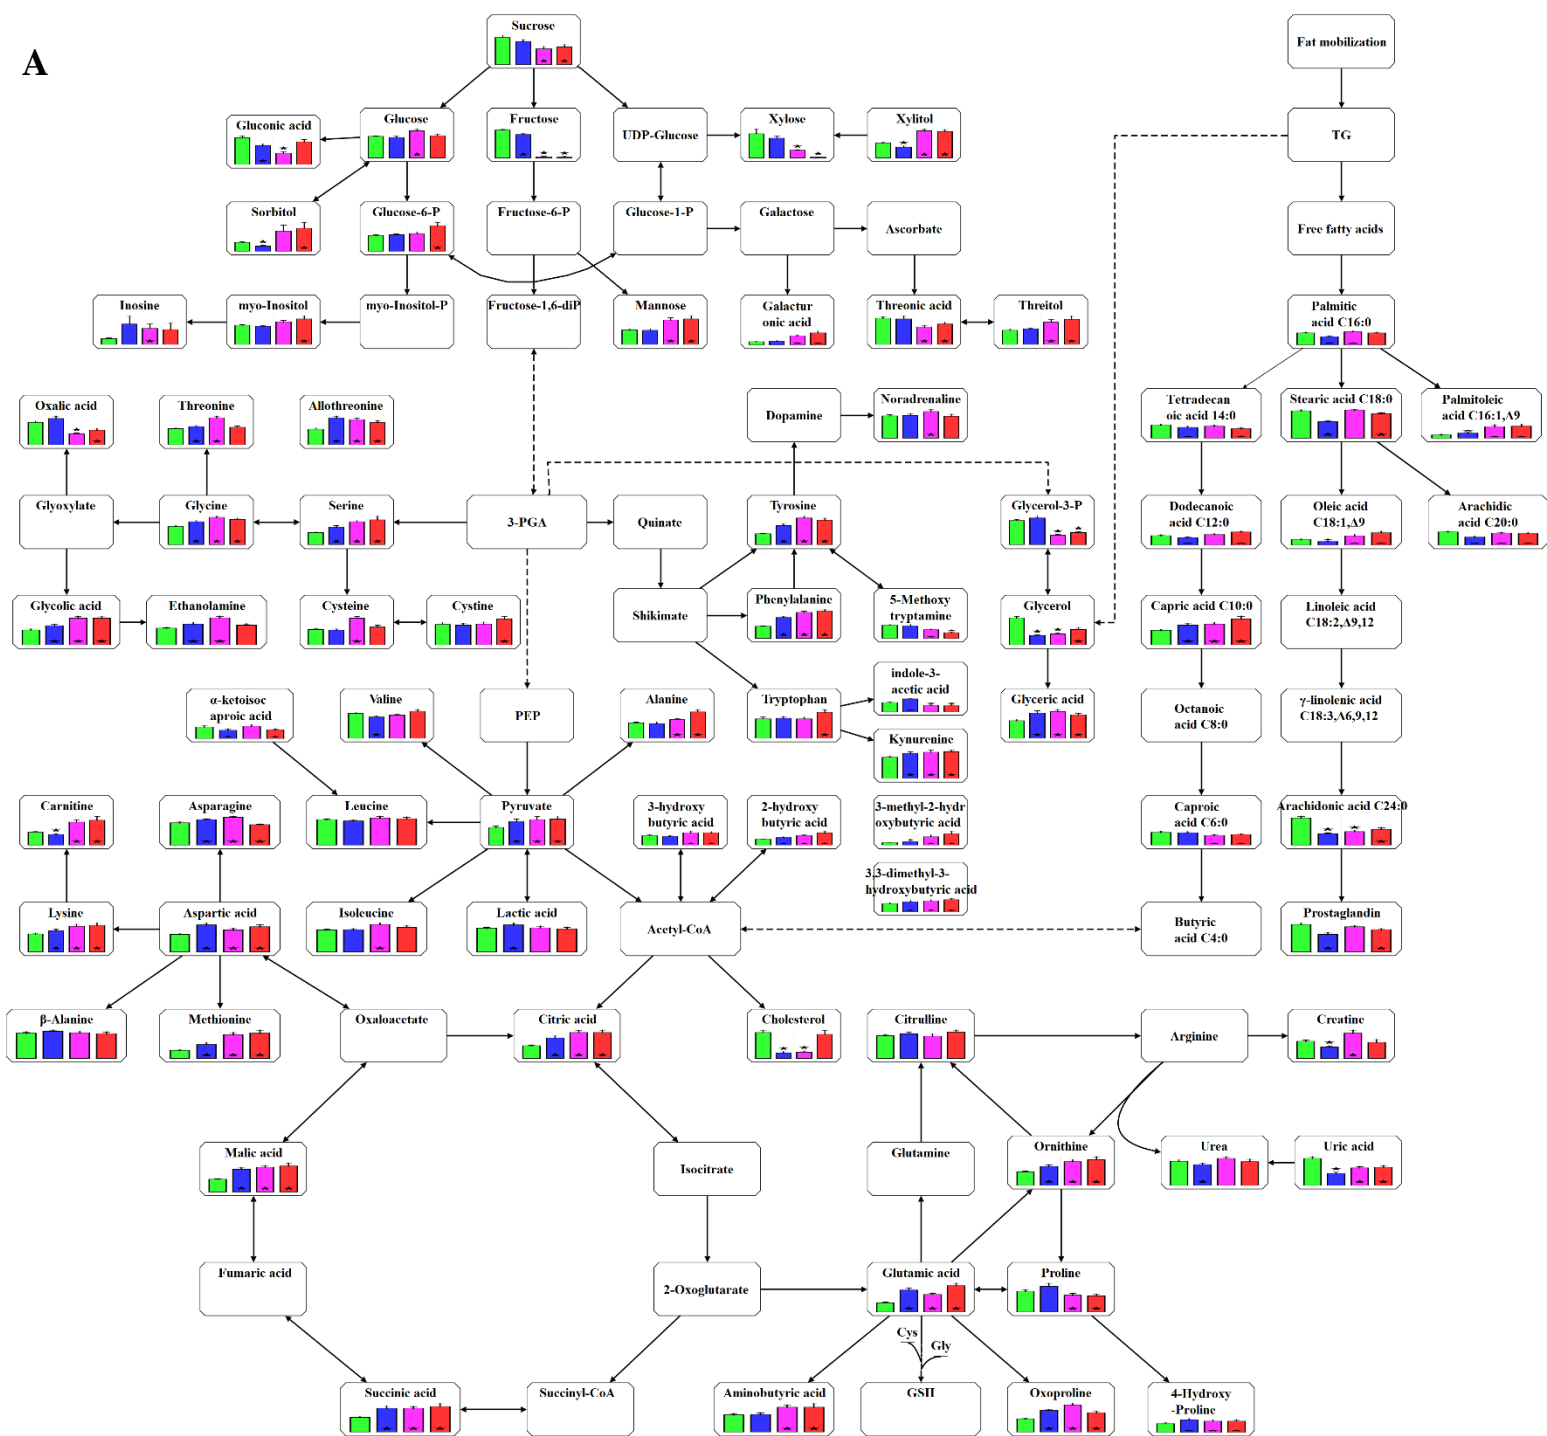

**Figure S6.** Metabolic network of the detected metabolites in this study. The normalized contents of each metabolite in NC (green bar chart), HBV (blue bar chart), LC (purple bar chart) and HCC (red bar chart) are shown under the chemical name.

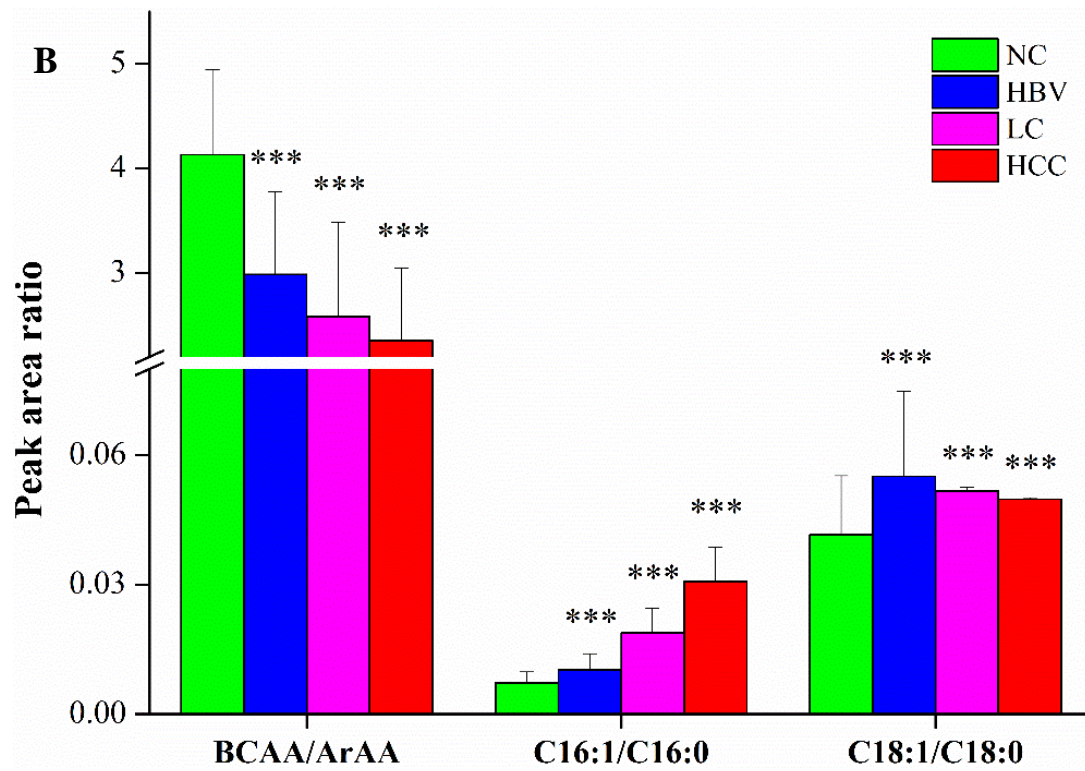

**Figure S7.** The ratio of BCAA (leucine, isoleucine, and valine) to ArAA (tyrosine, phenylalanine and tryptophan), the ratio of FFA C16:1 to FFA C16:0 and FFA C18:1 to FFA C18:0.
